# Supplementary material
Source: PubMed Central journal article supplement (PMC6777225)
Supplement: jamacardiol-4-1131-s001.pdf [file jamacardiol-4-1131-s001.pdf]

## Supplementary Online Content

Mortensen MB, Nordestgaard BG. Statin use in primary prevention of atherosclerotic cardiovascular disease according to 5 major guidelines for sensitivity, specificity, and number needed to treat. *JAMA Cardiol*. Published online October 2, 2019.  
doi:10.1001/jamacardio.2019.3665

### **eMethods.**

**eTable 1.** Atherosclerotic cardiovascular disease risk enhancers according to the 2018 ACC/AHA cholesterol guidelines

**eTable 2.** Baseline characteristics of all men from the Copenhagen General Population Study

**eTable 3.** Baseline characteristics of all women from the Copenhagen General Population Study

**eTable 4.** Positive and negative predictive values for statin allocation according to 5 guidelines

**eTable 5.** Event rates per 1000 person-years for atherosclerotic cardiovascular disease in individuals eligible for statin therapy for primary prevention according to 5 guidelines

**eTable 6.** Calculations of the number needed to treat to prevent one ASCVD event in 10 years among individuals aged 40-75

**eTable 7.** Calculations of the number needed to treat to prevent one ASCVD event in 10 years among individuals aged 40-65

**eTable 8.** Calculations of the number needed to treat to prevent one ASCVD event in 10 years among individuals aged 66-75

**eTable 9.** Baseline characteristics of individuals without known atherosclerotic cardiovascular disease or statin use at baseline from the Copenhagen General Population Study

**eFigure 1.** Clinical performance of 5 major guidelines on cholesterol treatment for primary prevention of ASCVD stratified by gender in the Copenhagen General Population Study

**eFigure 2.** Area-proportional Venn diagrams demonstrating overlap in statin eligibility by 5 major guidelines on statin use for primary prevention

**eFigure 3.** Statin eligibility, ASCVD sensitivity and specificity of five major guidelines for primary prevention of ASCVD stratified by 5-year age groups in men in the Copenhagen General Population Study

**eFigure 4.** Statin eligibility, ASCVD sensitivity and specificity for primary prevention of ASCVD of five major guidelines stratified by 5-year age groups in women in the Copenhagen General Population Study

**eFigure 5.** Total number of ASCVD events prevented versus total number of additional diabetes diagnoses per 100,000 Copenhagen General Population participants by following the 5 major statin guidelines

**eFigure 6.** Clinical performance of two different interpretations of ACC/AHA class I recommendations

**eFigure 7.** Clinical performance of 5 major guidelines on cholesterol treatment for primary prevention of ASCVD among individuals aged 40 to 75 also including the weaker class IIa

(for ESC/EAS), IIb (for ACC/AHA) and C recommendation (for USPSTF) in the Copenhagen General Population Study

**eFigure 8.** The number needed to treat to prevent one ASCVD event in primary prevention in individuals aged 40-75 also including the weaker class IIa (ESC/EAS), IIb (ACC/AHA) and C recommendation (for USPSTF)

**eFigure 9.** Clinical performance of 5 major guidelines on cholesterol treatment for primary prevention of ASCVD among individuals aged 40 to 65 in the Copenhagen General Population Study

**eFigure 10.** The number needed to treat (NNT) to prevent one ASCVD event in primary prevention in individuals aged 40-65

**eFigure 11.** The number needed to treat (NNT) to prevent one ASCVD event in primary prevention in individuals aged 66-75.

This supplementary material has been provided by the authors to give readers additional information about their work.

### Supplementary Methods

## **Recommendations for statin therapy by the 5 guidelines**

The UK NICE guideline recommends statin therapy to asymptomatic individuals aged 40 years and older with a 10-year risk for any ASCVD of  $\geq 10\%$  estimated using the QRISK2<sup>1</sup> prediction model or to individuals with non-dialysis dependent chronic kidney disease (CKD) (Should be offered)<sup>2</sup>. The USPSTF statement (referred to as guideline in our paper) recommend statin therapy to asymptomatic individuals aged 40-75 who have 1 or more ASCVD risk factors and a 10-year risk of any ASCVD  $\geq 10\%$  estimated using PCE (Grade B recommendation, offer or provide this service)<sup>3</sup>. The CCS guideline recommends statin therapy to asymptomatic individuals aged 40-75 with a 10-year risk of any ASCVD  $\geq 20\%$  estimated with the Framingham Risk Score (FRS)<sup>4</sup> or with a 10-year risk of any ASCVD  $\geq 10\%$  and  $< 20\%$  combined with a low-density lipoprotein cholesterol (LDL-C)  $\geq 193$  mg/dL (5.0 mmol/L) (Strong recommendations, High-Quality Evidence). Further, the CCS guideline recommend statins to individuals with diabetes or with CKD (age  $\geq 50$  years)<sup>5</sup>. The ESC/EAS guideline recommends risk-based statin therapy to asymptomatic individuals aged 40-65 (age-range of the Systematic Coronary Risk Evaluation (SCORE)) with an LDL-C  $\geq 97$  mg/dL (2.5 mmol/L) combined with a 10-year risk for fatal ASCVD of  $\geq 10\%$  estimated using the SCORE prediction model or to individuals with an LDL-C  $\geq 155$  mg/dL (4.0 mmol/L) combined with a 10-year risk of fatal ASCVD of  $\geq 5\%$  and  $< 10\%$  (Class I recommendations)<sup>6</sup>; for individuals aged  $\leq 65$  as well as  $> 65$ , there are class I recommendations for statin therapy to asymptomatic individuals with familial hypercholesterolemia (LDL-C  $\geq 232$  mg/dL (6.0 mmol/L) or total cholesterol  $\geq 309$  mg/dL (8.0 mmol/L)), non-dialysis dependent CKD or with diabetes. The ACC/AHA guideline recommend statin therapy to asymptomatic individuals aged 40-75 with LDL-C  $\geq 190$  mg/dL (4.9 mmol/L), diabetes or an estimated 10-year risk for any ASCVD of  $\geq 7.5\%$  estimated using the Pooled Cohort Equations (PCE)<sup>7,8</sup> prediction model (Class I recommendations)<sup>9</sup>.

As the USPSTF, ESC/EAS and ACC/AHA guidelines also provide weaker class IIa (ESC/EAS), C (USPSTF) or IIb (ACC/AHA) recommendations for statin therapy, we assessed the performance of these criteria in sensitivity analyses. The USPSTF C recommendation lowers the 10-year PCE threshold from 10% to 7.5%. The ESC/EAS Class IIa recommendation lowers the LDL-C based threshold to  $\geq 70$  mg/dL (1.8 mmol/L) for individuals with a 10-year SCORE risk  $\geq 10\%$  and to  $\geq 97$  mg/dL (2.5 mmol/L) for individuals with a 10-year SCORE risk  $\geq 5\%$  and  $< 10\%$  <sup>6</sup>. Finally, the ACC/AHA Class IIb recommendation lowers the 10-year PCE threshold from 7.5% to 5%

(“borderline risk”). In contrast to the 2013 ACC/AHA guidelines<sup>10</sup>, the 2018 ACC/AHA guidelines state that statin therapy should only be initiated if risk-enhancing factors are present (such as family history of premature ASCVD, metabolic syndrome and chronic kidney disease). A full list of risk-enhancers is shown in **Supplementary Table 1**<sup>9</sup>.

## References

1. Hippisley-Cox J, Coupland C, Vinogradova Y, Robson J, Minhas R, Sheikh A, Brindle P. Predicting cardiovascular risk in England and Wales: prospective derivation and validation of QRISK2. *BMJ British Medical Journal Publishing Group*; 2008;**336**:1475–1482.
2. JBS3 Board. Joint British Societies' consensus recommendations for the prevention of cardiovascular disease (JBS3). *Heart*. BMJ Publishing Group Ltd and British Cardiovascular Society; 2014. p. ii1–ii67.
3. US Preventive Services Task Force, Bibbins-Domingo K, Grossman DC, Curry SJ, Davidson KW, Epling JW, García FAR, Gillman MW, Kemper AR, Krist AH, Kurth AE, Landefeld CS, LeFevre ML, Mangione CM, Phillips WR, Owens DK, Phipps MG, Pignone MP. Statin Use for the Primary Prevention of Cardiovascular Disease in Adults: US Preventive Services Task Force Recommendation Statement. *JAMA American Medical Association*; 2016;**316**:1997–2007.
4. D'Agostino RB, Vasan RS, Pencina MJ, Wolf PA, Cobain M, Massaro JM, Kannel WB. General cardiovascular risk profile for use in primary care: the Framingham Heart Study. *Circulation American Heart Association, Inc*; 2008;**117**:743–753.
5. Anderson TJ, Grégoire J, Pearson GJ, Barry AR, Couture P, Dawes M, Francis GA, Genest J, Grover S, Gupta M, Hegele RA, Lau DC, Leiter LA, Lonn E, Mancini GBJ, McPherson R, Ngui D, Poirier P, Sievenpiper JL, Stone JA, Thanassoulis G, Ward R. 2016 Canadian Cardiovascular Society Guidelines for the Management of Dyslipidemia for the Prevention of Cardiovascular Disease in the Adult. *Can J Cardiol Elsevier*; 2016;**32**:1263–1282.
6. Piepoli MF, Hoes AW, Agewall S, Albus C, Brotons C, Catapano AL, Cooney MT, Corrà U, Cosyns B, Deaton C, Graham I, Hall MS, Hobbs FDR, Løchen M-L, Löllgen H, Marques-Vidal P, Perk J, Prescott E, Redon J, Richter DJ, Sattar N, Smulders Y, Tiberi M, van der Worp HB, van Dis I, Verschuren WMM, Authors/Task Force Members. 2016 European Guidelines on cardiovascular disease prevention in clinical practice: The Sixth Joint Task Force of the European Society of Cardiology and Other Societies on Cardiovascular Disease Prevention in Clinical Practice (constituted by representatives of 10 societies and by invited experts)Developed with the special contribution of the European Association for Cardiovascular Prevention & Rehabilitation (EACPR). *Eur Heart J* 2016;**37**:2315–2381.

7. Lloyd-Jones DM, Braun LT, Ndumele CE, Smith SC, Sperling LS, Virani SS, Blumenthal RS. Use of Risk Assessment Tools to Guide Decision-Making in the Primary Prevention of Atherosclerotic Cardiovascular Disease: A Special Report From the American Heart Association and American College of Cardiology. *Journal of the American College of Cardiology* 2018.
8. Goff DC, Lloyd-Jones DM, Bennett G, Coady S, D'Agostino RB, Gibbons R, Greenland P, Lackland DT, Levy D, O'Donnell CJ, Robinson JG, Schwartz JS, Shero ST, Smith SC, Sorlie P, Stone NJ, Wilson PWF, American College of Cardiology/American Heart Association Task Force on Practice Guidelines. 2013 ACC/AHA guideline on the assessment of cardiovascular risk: a report of the American College of Cardiology/American Heart Association Task Force on Practice Guidelines. *Journal of the American College of Cardiology*. 2014. p. 2935–2959.
9. Grundy SM, Stone NJ, Bailey AL, Beam C, Birtcher KK, Blumenthal RS, Braun LT, de Ferranti S, Faiella-Tommasino J, Forman DE, Goldberg R, Heidenreich PA, Hlatky MA, Jones DW, Lloyd-Jones D, Lopez-Pajares N, Ndumele CE, Orringer CE, Peralta CA, Saseen JJ, Smith SC, Sperling L, Virani SS, Yeboah J. 2018 AHA/ACC/AACVPR/AAPA/ABC/ACPM/ADA/AGS/APhA/ASPC/NLA/PCNA Guideline on the Management of Blood Cholesterol: A Report of the American College of Cardiology/American Heart Association Task Force on Clinical Practice Guidelines. *Journal of the American College of Cardiology* 2018.
10. Stone NJ, Robinson JG, Lichtenstein AH, Bairey Merz CN, Blum CB, Eckel RH, Goldberg AC, Gordon D, Levy D, Lloyd-Jones DM, McBride P, Schwartz JS, Shero ST, Watson K, Wilson PWF, Eddleman KM, Jarrett NM, LaBresh K, Nevo L, Wnek J, Anderson JL, Halperin JL, Albert NM, Bozkurt B, Brindis RG, Curtis LH, DeMets D, Hochman JS, Kovacs RJ, Ohman EM, et al. 2013 ACC/AHA guideline on the treatment of blood cholesterol to reduce atherosclerotic cardiovascular risk in adults: a report of the American College of Cardiology/American Heart Association Task Force on Practice Guidelines. *Circulation*. American Heart Association, Inc; 2014. p. S1–S45.

**eTable 1: Atherosclerotic cardiovascular disease risk enhancers according to the 2018 ACC/AHA cholesterol guidelines.**

|                                                                                                                                                                                                                                                                                                                                                                                                                                                                                                                                                                                                                                                                          |
|--------------------------------------------------------------------------------------------------------------------------------------------------------------------------------------------------------------------------------------------------------------------------------------------------------------------------------------------------------------------------------------------------------------------------------------------------------------------------------------------------------------------------------------------------------------------------------------------------------------------------------------------------------------------------|
| <ul style="list-style-type: none"><li>• Family history of ASCVD</li><li>• Persistently elevated LDL-C <math>\geq</math> 160 mg/dL (4.1 mmol/L)</li><li>• Chronic kidney disease</li><li>• Metabolic syndrome</li></ul> <p><u>Lipid/biomarkers:</u></p> <ul style="list-style-type: none"><li>• Persistently elevated triglycerides <math>\geq</math> 175 mg/dL (2.0 mmol/L)</li></ul> <p><u>In selected individuals if measured:</u></p> <ul style="list-style-type: none"><li>• hs-CRP <math>\geq</math> 2.0 mg/dL</li><li>• Lp(a) <math>&gt;</math> 50 mg/dL</li><li>• apoB <math>\geq</math> 130 mg/dL</li><li>• Ankle-brachial index <math>&lt;</math> 0.9</li></ul> |
|--------------------------------------------------------------------------------------------------------------------------------------------------------------------------------------------------------------------------------------------------------------------------------------------------------------------------------------------------------------------------------------------------------------------------------------------------------------------------------------------------------------------------------------------------------------------------------------------------------------------------------------------------------------------------|

ASCVD: Atherosclerotic cardiovascular disease; LDL-C: Low-density lipoprotein cholesterol; hs-CRP: High-sensitive C-reactive protein; Lp(a): Lipoprotein(a); apoB: Apolipoprotein(B).

**eTable 2. Baseline characteristics of all men from the Copenhagen General Population Study and men eligible for statin therapy according to 5 major statin guidelines for primary prevention of atherosclerotic cardiovascular disease.**

|                                              | Statin eligibility according to guidelines |                  |                  |                  |                  |                  |
|----------------------------------------------|--------------------------------------------|------------------|------------------|------------------|------------------|------------------|
| Characteristics                              | All men                                    | CCS              | ACC/AHA          | NICE             | USPSTF           | ESC/EAS          |
| Individuals, n                               | 19870                                      | 11431            | 11785            | 9947             | 9200             | 2547             |
| Gender, male %                               | 100                                        | 100              | 100              | 100              | 100              | 100              |
| Age, median (IQR), year                      | 56 (48-64)                                 | 61 (54-67)       | 62 (56-68)       | 64 (59-69)       | 64 (59-69)       | 62 (57-65)       |
| Systolic blood pressure, median (IQR), mmHg  | 140 (130-155)                              | 148 (135-161)    | 148 (135-160)    | 149 (135-162)    | 150 (140-164)    | 155 (140-170)    |
| Diastolic blood pressure, median (IQR), mmHg | 85 (80-93)                                 | 88 (80-96)       | 88 (80-95)       | 88 (80-95)       | 89 (80-96)       | 90 (82-100)      |
| Plasma cholesterol, median (IQR)             |                                            |                  |                  |                  |                  |                  |
| Total cholesterol, mg/dL                     | 220 (197-247)                              | 236 (213-259)    | 232 (205-259)    | 228 (201-251)    | 232 (205-255)    | 252 (221-283)    |
| mmol/L                                       | 5.7 (5.1-6.4)                              | 6.1 (5.5-6.7)    | 6.0 (5.3-6.7)    | 5.9 (5.2-6.5)    | 6.0 (5.3-6.6)    | 6.5 (5.7-7.3)    |
| HDL cholesterol, mg/dL                       | 53 (43-65)                                 | 50 (41-62)       | 51 (42-64)       | 51 (41-64)       | 51 (41-63)       | 50 (43-66)       |
| mmol/L                                       | 1.4 (1.1-1.7)                              | 1.3 (1.1-1.6)    | 1.3 (1.1-1.7)    | 1.3 (1.1-1.7)    | 1.3 (1.1-1.7)    | 1.3 (1.1-1.7)    |
| LDL cholesterol, md/dL                       | 131 (108-155)                              | 143 (124-166)    | 139 (116-162)    | 135 (112-159)    | 139 (116-162)    | 163 (128-186)    |
| mmol/L                                       | 3.4 (2.8-4.0)                              | 3.7 (3.2-4.3)    | 3.6 (3.0-4.2)    | 3.5 (2.9-4.1)    | 3.6 (3.0-4.2)    | 4.2 (3.3-4.8)    |
| Current smokers, %                           | 23                                         | 31               | 32               | 32               | 36               | 38               |
| Diabetes, %                                  | 2                                          | 4                | 4                | 5                | 4                | 19               |
| 10-year PCE risk, median (IQR), %            | 9.7 (4.3-18.0)                             | 16.2 (10.6-24.0) | 15.9 (10.9-23.5) | 18.0 (13.2-25.3) | 18.7 (13.8-26.0) | 20.9 (15.6-28.3) |

HDL=high-density lipoprotein; LDL=low-density lipoprotein; ASCVD=atherosclerotic cardiovascular disease. IQR=interquartile range. PCE=Pooled Cohort Equations; ACC=American College of Cardiology; AHA=American Heart Association; CCS=Canadian Cardiovascular Society; NICE=National Institute for Health and Care Excellence; USPSTF=US Preventive Services Task Force; ESC= European Society of Cardiology; EAS= European Atherosclerosis Society.

**eTable 3. Baseline characteristics of all women from the Copenhagen General Population Study and of women eligible for statin therapy according to 5 major statin guidelines for primary prevention of atherosclerotic cardiovascular disease.**

| Characteristics                              | Statin eligibility according to guidelines |                |                 |                 |                  |                |
|----------------------------------------------|--------------------------------------------|----------------|-----------------|-----------------|------------------|----------------|
|                                              | All women                                  | CCS            | ACC/AHA         | NICE            | USPSTF           | ESC/EAS        |
| Individuals, n                               | 25880                                      | 8522           | 7615            | 8249            | 4766             | 4323           |
| Gender, male %                               | 0                                          | 0              | 0               | 0               | 0                | 0              |
| Age, median (IQR), year                      | 56 (48-64)                                 | 64 (59-69)     | 67 (62-71)      | 67 (62-71)      | 70 (66-73)       | 64 (58-69)     |
| Systolic blood pressure, median (IQR), mmHg  | 135 (122-150)                              | 150 (136-165)  | 150 (136-165)   | 147 (132-162)   | 155 (142-170)    | 144 (130-160)  |
| Diastolic blood pressure, median (IQR), mmHg | 81 (75-90)                                 | 85 (80-94)     | 85 (79-92)      | 84 (78-91)      | 86 (80-94)       | 84 (77-90)     |
| Plasma cholesterol, median (IQR)             |                                            |                |                 |                 |                  |                |
| Total cholesterol, mg/dL                     | 224 (197-251)                              | 252 (228-275)  | 247 (220-278)   | 243 (216-271)   | 243 (220-271)    | 352 (224-286)  |
| mmol/L                                       | 5.8 (5.1-6.5)                              | 6.5 (5.9-7.1)  | 6.4 (5.7-7.2)   | 6.3 (5.6-7.0)   | 6.3 (5.7-7.0)    | 6.5 (5.8-7.4)  |
| HDL cholesterol, mg/dL                       | 68 (56-82)                                 | 66 (54-81)     | 65 (52-80)      | 65 (52-80)      | 65 (52-80)       | 70 (54-85)     |
| mmol/L                                       | 1.8 (1.4-2.1)                              | 1.7 (1.4-2.1)  | 1.7 (1.3-2.1)   | 1.7 (1.3-2.1)   | 1.7 (1.3-2.1)    | 1.8 (1.4-2.2)  |
| LDL cholesterol, md/dL                       | 128 (104-151)                              | 150 (135-174)  | 151 (124-182)   | 143 (120-170)   | 147 (124-170)    | 151 (128-181)  |
| mmol/L                                       | 3.3 (2.7-3.9)                              | 3.9 (3.5-4.5)  | 3.9 (3.2-4.7)   | 3.7 (3.1-4.4)   | 3.8 (3.2-4.4)    | 3.9 (3.3-4.7)  |
| Current smokers, %                           | 21                                         | 28             | 32              | 28              | 35               | 23             |
| Diabetes, %                                  | 1                                          | 4              | 5               | 6               | 4                | 7              |
| 10-year PCE risk, median (IQR), %            | 3.2 (1.1-7.9)                              | 9.4 (5.6-15.8) | 12.0 (8.7-17.7) | 11.5 (7.9-17.2) | 15.9 (12.4-21.3) | 8.9 (4.1-15.5) |



|  |  |  |  |  |  |  |
|--|--|--|--|--|--|--|
|  |  |  |  |  |  |  |
|--|--|--|--|--|--|--|

HDL=high-density lipoprotein; LDL=low-density lipoprotein; ASCVD=atherosclerotic cardiovascular disease. IQR=interquartile range. PCE=Pooled

Cohort Equations; ACC=American College of Cardiology; AHA=American Heart Association; CCS=Canadian Cardiovascular Society;

NICE=National Institute for Health and Care Excellence; USPSTF=US Preventive Services Task Force; ESC= European Society of Cardiology;

EAS= European Atherosclerosis Society.

**eTable 4: Positive and negative predictive values for statin allocation according to 5 guidelines**

|     |  |     |         | Guideline eligibility |        |         |
|-----|--|-----|---------|-----------------------|--------|---------|
|     |  | CCS | ACC/AHA | NICE                  | USPSTF | ESC/EAS |
| PPV |  | 14% | 15%     | 15%                   | 17%    | 15%     |
| NPV |  | 95% | 95%     | 95%                   | 94%    | 92%     |

PPV=positive predictive value; NPV=negative predictive value; ACC=American College of Cardiology; AHA=American Heart Association;

CCS=Canadian Cardiovascular Society; NICE=National Institute for Health and Care Excellence; USPSTF=US Preventive Services Task Force;

ESC= European Society of Cardiology; EAS= European Atherosclerosis Society.

**eTable 5: Event rates per 1000 person-years for atherosclerotic cardiovascular disease in individuals eligible for statin therapy for primary prevention according to 5 guidelines**

|             |  |                  |                     | Guideline eligibility |                     |                     |                     |  |
|-------------|--|------------------|---------------------|-----------------------|---------------------|---------------------|---------------------|--|
| Event rates |  | ALL              | CCS                 | ACC/AHA               | NICE                | USPSTF              | ESC/EAS             |  |
| ASCVD       |  | 6.7<br>(6.5-9.0) | 11.1<br>(10.6-11.7) | 11.6<br>(11.1-12.2)   | 12.2<br>(11.7-12.8) | 13.6<br>(12.9-14.3) | 11.7<br>(10.8-12.6) |  |

ASCVD= Atherosclerotic cardiovascular disease; ACC=American College of Cardiology; AHA=American Heart Association; CCS=Canadian

Cardiovascular Society; NICE=National Institute for Health and Care Excellence; USPSTF=US Preventive Services Task Force; ESC= European

Society of Cardiology; EAS= European Atherosclerosis Society.

**eTable 6. Calculations of the number needed to treat to prevent one ASCVD event in 10 years among individuals aged 40-75. The calculations are based on assuming a 25% relative risk reduction per 1 mmol/L LDL-C reduction and a 50% versus 30% LDL-C reduction with high- and moderate-intensity statin treatment, respectively.**

|                                       | Events by guidelines |                  |                  |                  |                  |                  |
|---------------------------------------|----------------------|------------------|------------------|------------------|------------------|------------------|
| Potential Outcomes                    | All events           | CCS              | ACC/AHA          | NICE             | USPSTF           | ESC/EAS          |
| Kaplan-Meier estimated 10 year events | 3097                 | 2200             | 2265             | 2225             | 1913             | 780              |
| <b>High-intensity statins</b>         |                      |                  |                  |                  |                  |                  |
| 50% LDL-C reduction, mmol/L           |                      | 1.92 (1.92-1.93) | 1.89 (1.88-1.90) | 1.82 (1.81-1.82) | 1.85 (1.84-1.85) | 2.02 (2.01-2.03) |
| Relative risk reduction, %            |                      | 42 (42-42)       | 42 (42-43)       | 41 (41-41)       | 41 (41-41)       | 44 (44-45)       |
| Events prevented                      |                      | 924 (924-980)    | 951 (951-974)    | 913 (913-913)    | 784 (784-784)    | 343 (343-351)    |
| Absolute risk reduction, %            |                      | 4.7 (4.7-5.0)    | 4.9 (4.9-5.0)    | 5.0 (5.0-5.0)    | 5.6 (5.6-5.6)    | 5.0 (5.0-5.1)    |
| NNT-10 to prevent 1 ASCVD event       |                      | 21 (20-21)       | 20 (20-20)       | 20 (20-20)       | 18 (18-18)       | 20 (20-20)       |
| <b>Moderate-intensity statins</b>     |                      |                  |                  |                  |                  |                  |
| 30% LDL-C reduction, mmol/L           |                      | 1.15 (1.15-1.16) | 1.13 (1.13-1.14) | 1.09 (1.09-1.09) | 1.11 (1.10-1.11) | 1.21 (1.20-1.22) |
| Relative risk reduction, %            |                      | 28 (28-28)       | 28 (28-28)       | 27 (27-27)       | 27 (27-27)       | 29 (29-30)       |
| Events prevented                      |                      | 616 (616-616)    | 634 (634-642)    | 601 (601-601)    | 517 (517-517)    | 226 (226-234)    |
| Absolute risk reduction, %            |                      | 3.1 (3.1-3.1)    | 3.3 (3.3-3.3)    | 3.3 (3.3-3.3)    | 3.7 (3.7-3.7)    | 3.3 (3.3-3.4)    |
| NNT-10 to prevent 1 ASCVD event       |                      | 32 (32-32)       | 30 (30-30)       | 30 (30-30)       | 27 (27-27)       | 29 (29-29)       |

Numbers are means (95% CI). ACC=American College of Cardiology; AHA=American Heart Association; CCS=Canadian Cardiovascular Society;

NICE=National Institute for Health and Care Excellence; USPSTF=US Preventive Services Task Force; ESC= European Society of Cardiology;

EAS= European Atherosclerosis Society.

**eTable 7. Calculations of the number needed to treat to prevent one ASCVD event in 10 years among individuals aged 40-65. The calculations are based on assuming a 25% relative risk reduction per 1 mmol/L LDL-C reduction and a 50% versus 30% LDL-C reduction with high- and moderate-intensity statin treatment, respectively.**

|                                       | Events by guidelines |                  |                  |                  |                  |                  |
|---------------------------------------|----------------------|------------------|------------------|------------------|------------------|------------------|
| Potential Outcomes                    | All events           | CCS              | ACC/AHA          | NICE             | USPSTF           | ESC/EAS          |
| Kaplan-Meier estimated 10 year events | 1833                 | 1109             | 1027             | 948              | 755              | 458              |
| <b>High-intensity statins</b>         |                      |                  |                  |                  |                  |                  |
| 50% LDL-C reduction, mmol/L           |                      | 1.97 (1.96-1.98) | 1.97 (1.96-1.97) | 1.87 (1.86-1.88) | 1.91 (1.89-1.92) | 2.07 (2.05-2.08) |
| Relative risk reduction, %            |                      | 43 (43-43)       | 43 (43-43)       | 42 (41-42)       | 42 (42-42)       | 45 (45-45)       |
| Events prevented                      |                      | 477 (477-477)    | 442 (442-442)    | 398 (389-398)    | 316 (316-316)    | 206 (206-206)    |
| Absolute risk reduction, %            |                      | 3.6 (3.6-3.6)    | 4.0 (4.0-4.0)    | 4.0 (3.9-4.0)    | 4.4 (4.4-4.4)    | 4.3 (4.3-4.3)    |
| NNT-10 to prevent 1 ASCVD event       |                      | 27 (27-27)       | 25 (25-25)       | 25 (25-26)       | 23 (23-23)       | 23 (23-23)       |
| <b>Moderate-intensity statins</b>     |                      |                  |                  |                  |                  |                  |
| 30% LDL-C reduction, mmol/L           |                      | 1.18 (1.18-1.19) | 1.18 (1.17-1.18) | 1.12 (1.12-1.13) | 1.14 (1.14-1.15) | 1.24 (1.23-1.25) |
| Relative risk reduction, %            |                      | 29 (29-29)       | 29 (29-29)       | 28 (28-28)       | 28 (28-28)       | 30 (30-30)       |
| Events prevented                      |                      | 324 (324-322)    | 298 (298-298)    | 265 (265-265)    | 209 (209-209)    | 137 (137-137)    |
| Absolute risk reduction, %            |                      | 2.4 (2.4-2.4)    | 2.6 (2.6-2.6)    | 2.7 (2.7-2.7)    | 2.9 (2.9-2.9)    | 2.9 (2.9-2.9)    |
| NNT-10 to prevent 1 ASCVD event       |                      | 40 (40-40)       | 38 (38-38)       | 37 (37-37)       | 35 (34-34)       | 35 (35-35)       |

Numbers are means (95% CI). ACC=American College of Cardiology; AHA=American Heart Association; CCS=Canadian Cardiovascular Society; NICE=National Institute for Health and Care Excellence; USPSTF=US Preventive Services Task Force; ESC= European Society of Cardiology; EAS= European Atherosclerosis Society.

**eTable 8. Calculations of the number needed to treat to prevent one ASCVD event in 10 years among individuals aged 66-75. The calculations are based on assuming a 25% relative risk reduction per 1 mmol/L LDL-C reduction and a 50% versus 30% LDL-C reduction with high- and moderate-intensity statin treatment, respectively.**

|                                       | Events by guidelines |                  |                  |                  |                  |                  |
|---------------------------------------|----------------------|------------------|------------------|------------------|------------------|------------------|
| Potential Outcomes                    | All events           | CCS              | ACC/AHA          | NICE             | USPSTF           | ESC/EAS          |
| Kaplan-Meier estimated 10 year events | 1264                 | 1101             | 1243             | 1281             | 1160             | 321              |
| <b>High-intensity statins</b>         |                      |                  |                  |                  |                  |                  |
| 50% LDL-C reduction, mmol/L           |                      | 1.83 (1.82-1.84) | 1.78 (1.77-1.79) | 1.76 (1.75-1.77) | 1.78 (1.78-1.80) | 1.92 (1.89-1.94) |
| Relative risk reduction, %            |                      | 41 (41-41)       | 40 (40-40)       | 40 (40-40)       | 40 (40-40)       | 42 (42-43)       |
| Events prevented                      |                      | 451 (451-451)    | 497 (497-497)    | 512 (512-512)    | 464 (464-464)    | 135 (135-138)    |
| Absolute risk reduction, %            |                      | 6.5 (6.6-6.6)    | 6.2 (6.2-6.2)    | 6.1 (6.1-6.1)    | 6.6 (6.6-6.6)    | 6.3 (6.3-6.3)    |
| NNT-10 to prevent 1 ASCVD event       |                      | 15 (15-15)       | 16 (16-16)       | 16 (16-16)       | 15 (15-15)       | 16 (15-16)       |
| <b>Moderate-intensity statins</b>     |                      |                  |                  |                  |                  |                  |
| 30% LDL-C reduction, mmol/L           |                      | 1.10 (1.09-1.11) | 1.07 (1.06-1.07) | 1.05 (1.05-1.06) | 1.07 (1.07-1.08) | 1.15 (1.14-1.16) |
| Relative risk reduction, %            |                      | 28 (28-28)       | 28 (28-28)       | 27 (27-27)       | 27 (27-27)       | 29 (29-30)       |
| Events prevented                      |                      | 308 (308-308)    | 348 (348-348)    | 346 (346-346)    | 313 (313-313)    | 93 (93-93)       |
| Absolute risk reduction, %            |                      | 4.5 (4.5-4.5)    | 4.3 (4.3-4.3)    | 4.2 (4.2-4.2)    | 4.5 (4.5-4.5)    | 4.4 (4.4-4.4)    |
| NNT-10 to prevent 1 ASCVD event       |                      | 22 (22-22)       | 23 (23-23)       | 24 (24-24)       | 22 (22-22)       | 23 (23-23)       |

Numbers are means (95% CI). ACC=American College of Cardiology; AHA=American Heart Association; CCS=Canadian Cardiovascular Society;

NICE=National Institute for Health and Care Excellence; USPSTF=US Preventive Services Task Force; ESC= European Society of Cardiology;

EAS= European Atherosclerosis Society.



**eTable 9. Baseline characteristics of individuals without known atherosclerotic cardiovascular disease or statin use at baseline from the Copenhagen General Population Study (CGPS), Multi Ethnic Study of Atherosclerosis (MESA) and the Reasons for Geographic and Racial Differences in Stroke (REGARDS) studies.**

| Characteristics                     | CGPS | MESA* | REGARDS** |
|-------------------------------------|------|-------|-----------|
| Gender, male %                      | 43   | 47    | 41        |
| Age, mean                           | 56   | 61    | 62        |
| Systolic blood pressure, mean, mmHg | 140  | 123   | 125       |
| Plasma cholesterol, mean            |      |       |           |
| Total cholesterol, mg/dL            | 220  | 194   | 203       |
| mmol/L                              | 5.7  | 5.0   | 5.2       |
| HDL cholesterol, mg/dL              | 61   | 46    | 54        |
| mmol/L                              | 1.6  | 1.2   | 1.4       |
| LDL cholesterol, mg/dL              | 128  | 120   | 125       |
| mmol/L                              | 3.3  | 3.1   | 3.2       |
| Current smokers, %                  | 21   | 13    | 15        |
| Diabetes, %                         | 2    | 11    | -         |

HDL=high-density lipoprotein; LDL=low-density lipoprotein;

\*Data from: Mortensen et al. Statin Trials, Cardiovascular Events, and Coronary Artery Calcification. JACC Cardiovascular Imaging, 2018 Feb;11(2 Pt 1):221-230

\*\*Data from Muntner et al. Validation of the Atherosclerotic Cardiovascular Disease Pooled Cohort Risk Equations. JAMA, 2014 (311): 1406-1415.



## Supplementary Figure 1

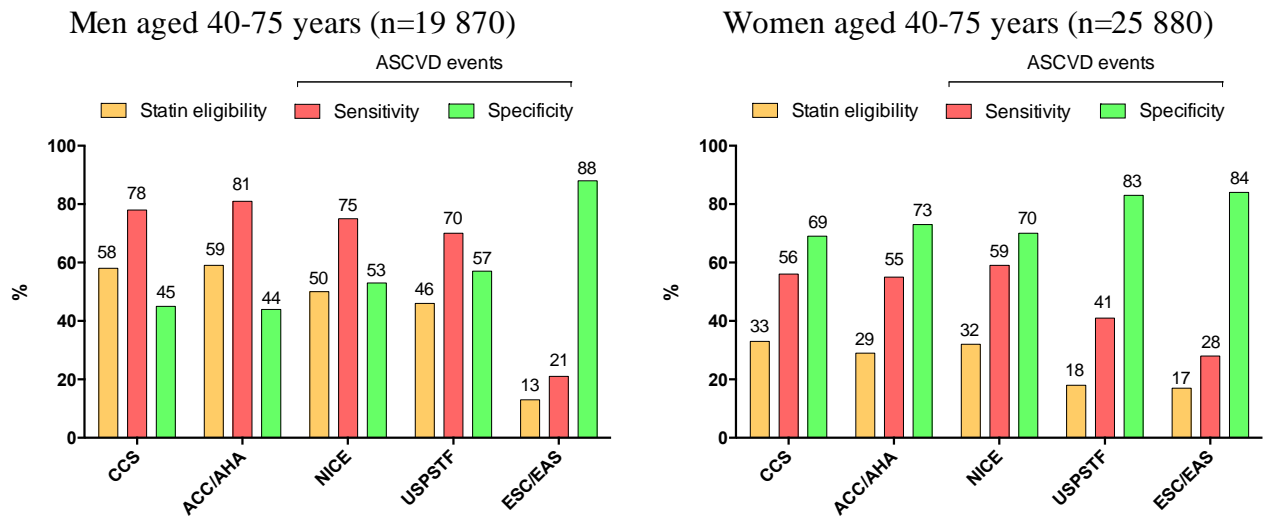

**Figure 1. Clinical performance of 5 major guidelines on cholesterol treatment for primary prevention of ASCVD stratified by gender in the Copenhagen General Population Study.** ASCVD events: non-fatal myocardial infarction, fatal coronary heart disease, and stroke. ASCVD=Atherosclerotic cardiovascular disease. ACC: American College of Cardiology. AHA: American Heart Association. CCS: Canadian Cardiovascular Society. NICE: National Institute for Health and Care Excellence. USPSTF: US Preventive Services Task Force. ESC: European Society of Cardiology. EAS: European Atherosclerosis Society.

## Supplementary Figure 2

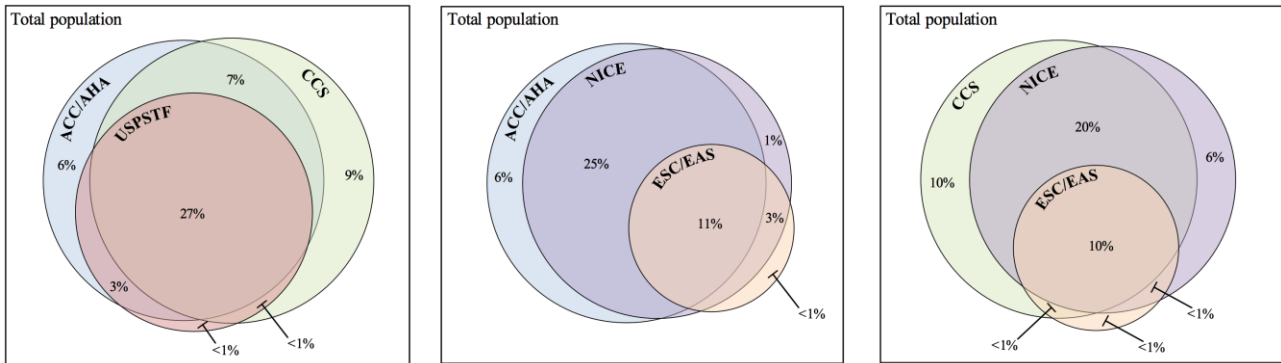

**eFigure 2. Area-proportional Venn diagrams demonstrating overlap in statin eligibility by 5 major guidelines on statin use for primary prevention.** ASCVD: Atherosclerotic cardiovascular disease. ACC: American College of Cardiology. AHA: American Heart Association. CCS: Canadian Cardiovascular Society. NICE: National Institute for Health and Care Excellence. USPSTF: US Preventive Services Task Force. ESC: European Society of Cardiology. EAS: European Atherosclerosis Society.

### Supplementary Figure 3

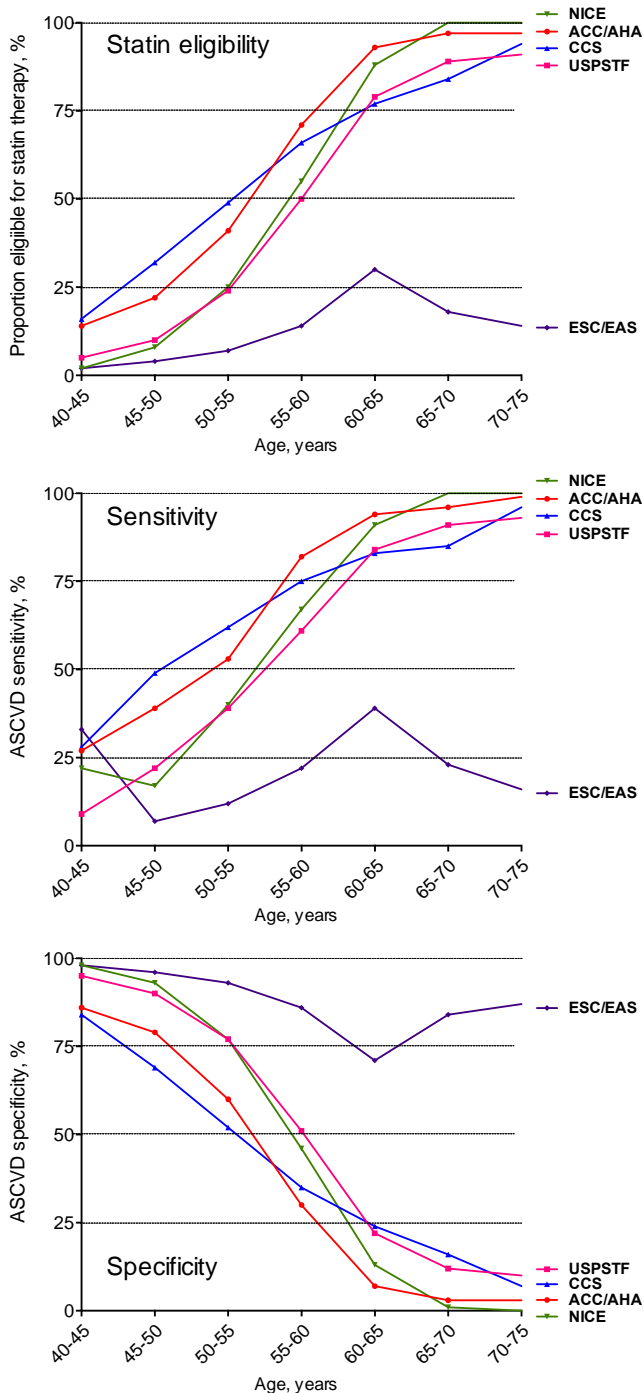

**Figure 3. Statin eligibility, ASCVD sensitivity and specificity of five major guidelines for primary prevention of ASCVD stratified by 5-year age groups in men in the Copenhagen General Population Study.** ASCVD=Atherosclerotic cardiovascular disease. ACC: American College of Cardiology. AHA: American Heart Association. CCS: Canadian Cardiovascular Society. NICE: National Institute for Health and Care Excellence. USPSTF: US Preventive Services Task Force. ESC: European Society of Cardiology. EAS: European Atherosclerosis Society.

### Supplementary Figure 4

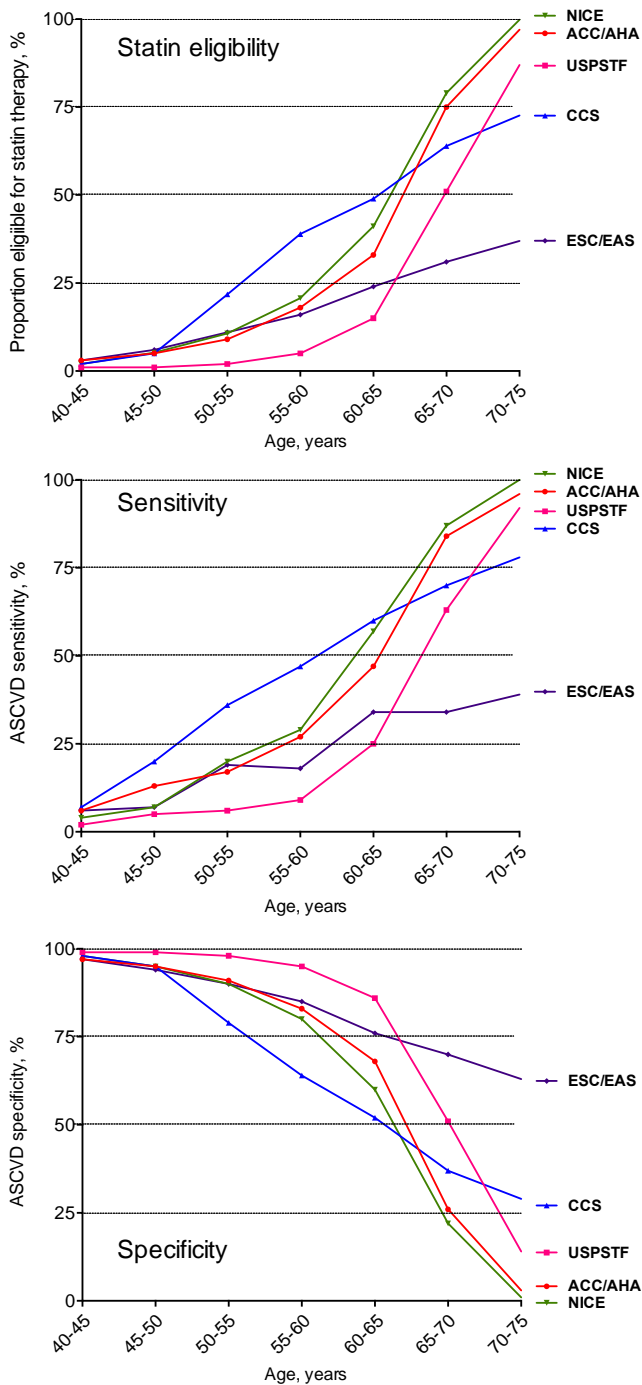

**Figure 4. Statin eligibility, ASCVD sensitivity and specificity for primary prevention of ASCVD of five major guidelines stratified by 5-year age groups in women in the Copenhagen General Population Study.** ASCVD=Atherosclerotic cardiovascular disease. ACC: American College of Cardiology. AHA: American Heart Association. CCS: Canadian Cardiovascular Society. NICE: National Institute for Health and Care Excellence. USPSTF: US Preventive Services Task Force. ESC: European Society of Cardiology. EAS: European Atherosclerosis Society.

Supplementary Figure 5

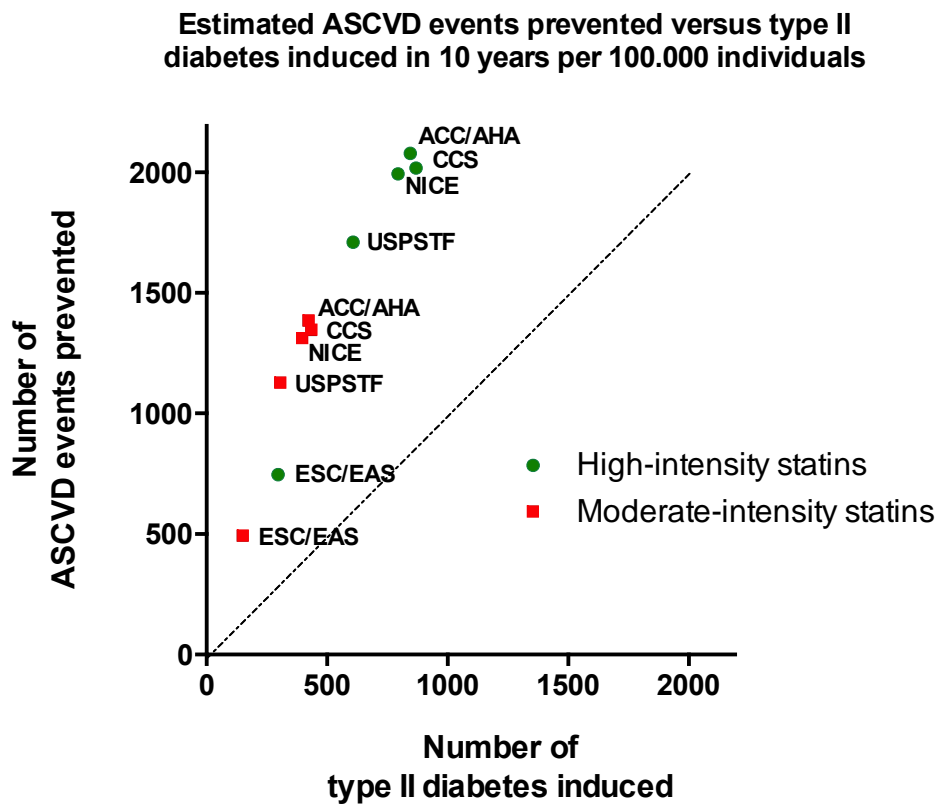

**eFigure 5. Total number of ASCVD events prevented versus total number of additional diabetes diagnoses per 100.000 Copenhagen General Population participants by following the 5 major statin guidelines.** For all the guidelines and for both high-intensity and moderate-intensity statin therapy, the estimated number of ASCVD events prevented was several times higher than expected additional diabetes diagnoses. ASCVD=Atherosclerotic cardiovascular disease. ACC: American College of Cardiology. AHA: American Heart Association. CCS: Canadian Cardiovascular Society. NICE: National Institute for Health and Care Excellence. USPSTF: US Preventive Services Task Force. ESC: European Society of Cardiology. EAS: European Atherosclerosis Society.

## Supplementary Figure 6

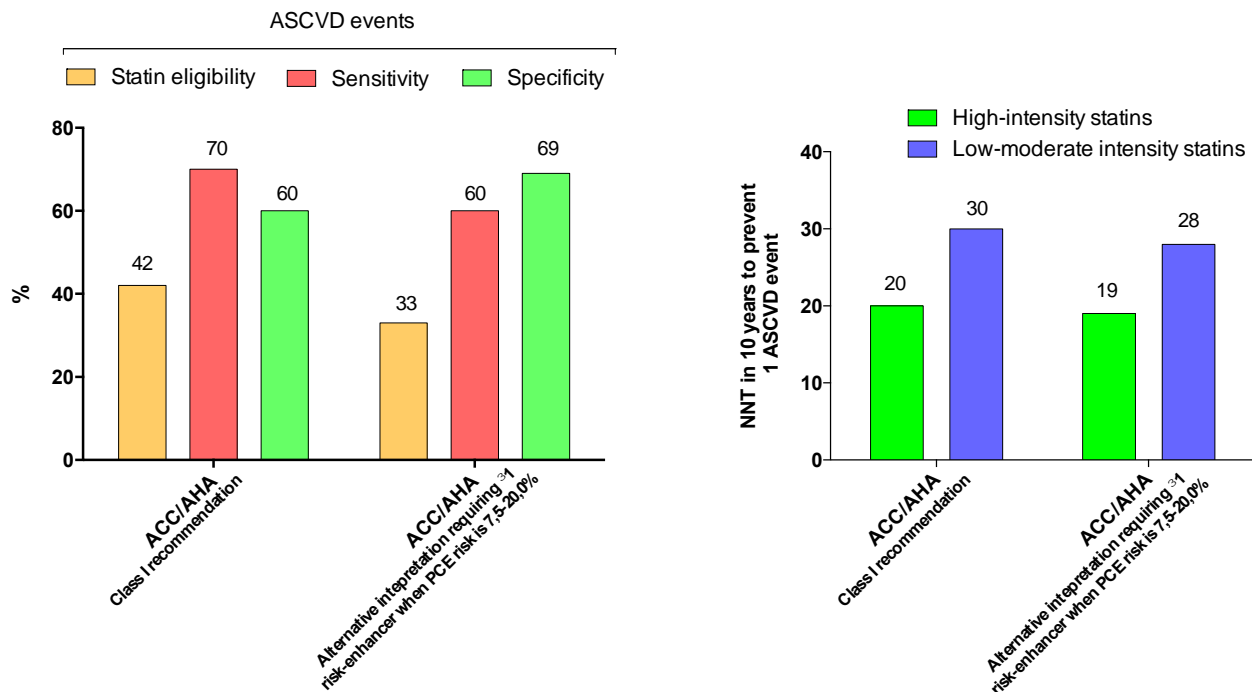

**Figure 6. Clinical performance of two different interpretations of ACC/AHA class I recommendations.** In the usual approach, individuals with PCE risk  $\geq 7.5\%$  to  $20\%$  does not need risk-enhancers to be statin eligible. In the alternative interpretation, all individuals with with PCE risk  $\geq 7.5\%$  to  $20\%$  should also have at least one risk-enhancer to qualify for statin therapy. ASCVD events: non-fatal myocardial infarction, fatal coronary heart disease, and stroke. ASCVD=Atherosclerotic cardiovascular disease. ACC: American College of Cardiology. AHA: American Heart Association.

## Supplementary Figure 7

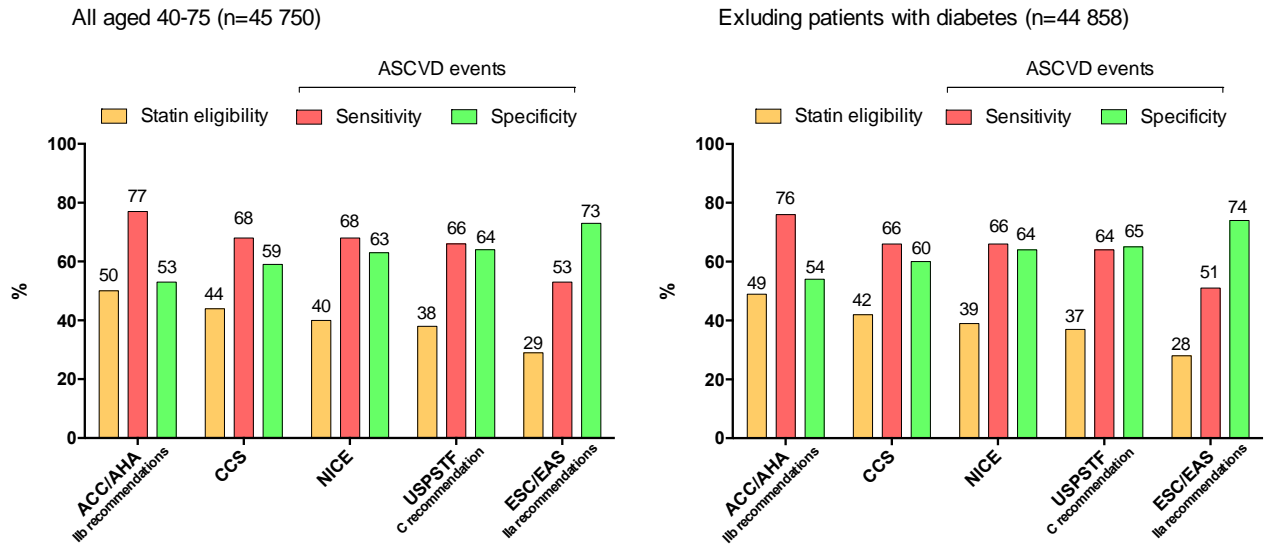

**Figure 7. Clinical performance of 5 major guidelines on cholesterol treatment for primary prevention of ASCVD among individuals aged 40 to 75 also including the weaker class IIa (for ESC/EAS), IIb (for ACC/AHA) and C recommendation (for USPSTF) in the Copenhagen General Population Study.** ASCVD events: non-fatal myocardial infarction, fatal coronary heart disease, and stroke. ASCVD=Atherosclerotic cardiovascular disease. ACC: American College of Cardiology. AHA: American Heart Association. CCS: Canadian Cardiovascular Society. NICE: National Institute for Health and Care Excellence. USPSTF: US Preventive Services Task Force. ESC: European Society of Cardiology. EAS: European Atherosclerosis Society.

## Supplementary Figure 8

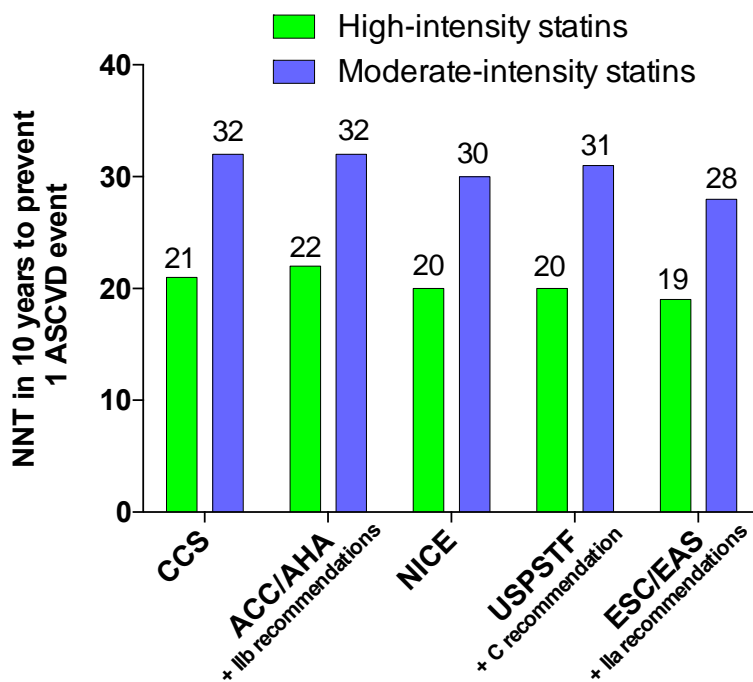

**Figure 8. The number needed to treat to prevent one ASCVD event in primary prevention in individuals aged 40-75 also including the weaker class IIa (ESC/EAS), IIb (ACC/AHA) and C recommendation (for USPSTF).** ASCVD: Atherosclerotic cardiovascular disease. ACC: American College of Cardiology. AHA: American Heart Association. CCS: Canadian Cardiovascular Society. NICE: National Institute for Health and Care Excellence. USPSTF: US Preventive Services Task Force. ESC: European Society of Cardiology. EAS: European Atherosclerosis Society.



## Supplementary Figure 9

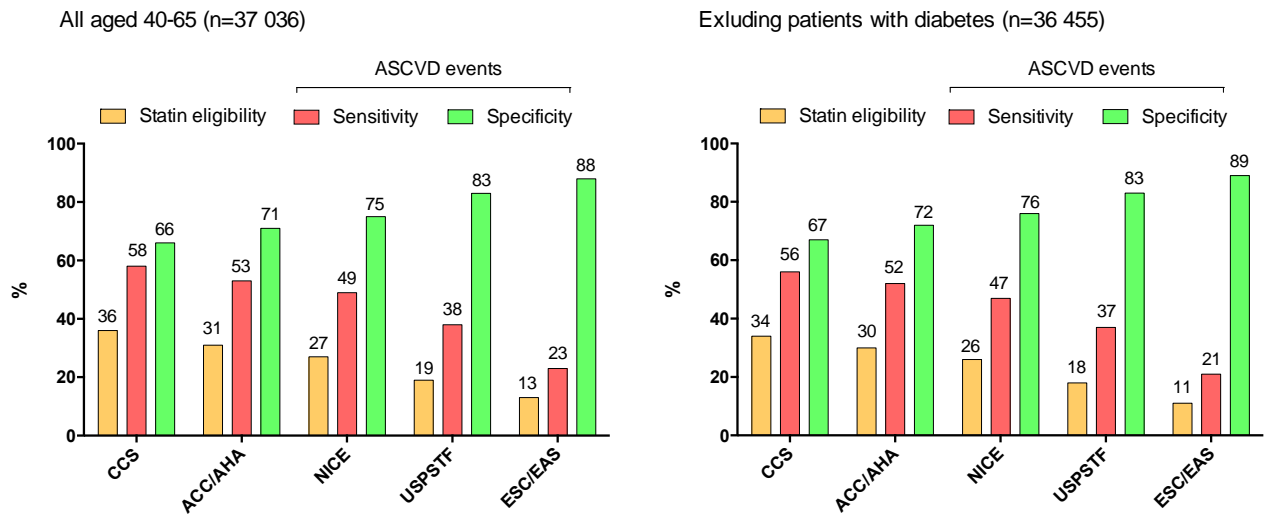

**Figure 9. Clinical performance of 5 major guidelines on cholesterol treatment for primary prevention of ASCVD among individuals aged 40 to 65 in the Copenhagen General Population Study.** ASCVD events: non-fatal myocardial infarction, fatal coronary heart disease, and stroke. ASCVD=Atherosclerotic cardiovascular disease. ACC: American College of Cardiology. AHA: American Heart Association. CCS: Canadian Cardiovascular Society. NICE: National Institute for Health and Care Excellence. USPSTF: US Preventive Services Task Force. ESC: European Society of Cardiology. EAS: European Atherosclerosis Society.

## Supplementary Figure 10

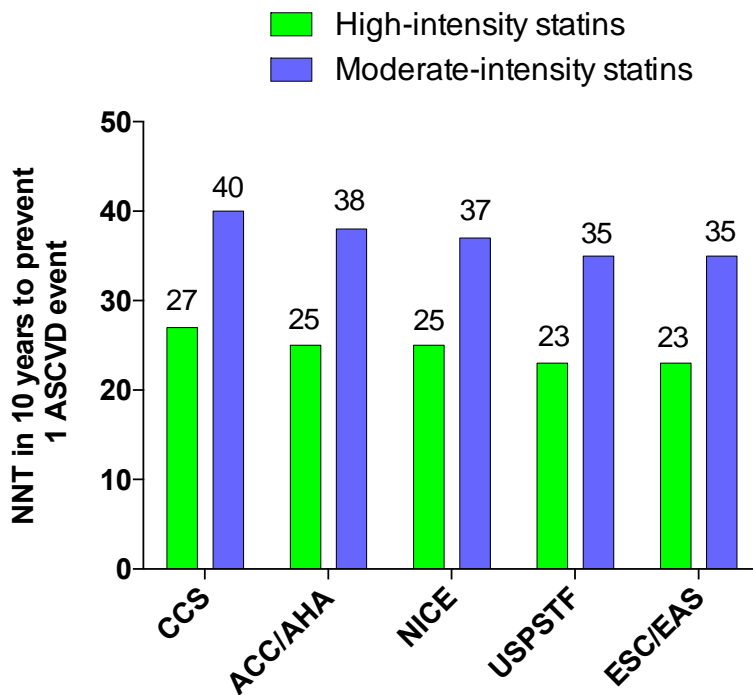

**eFigure 10. The number needed to treat (NNT) to prevent one ASCVD event in primary prevention in individuals aged 40-65.**

ASCVD: Atherosclerotic cardiovascular disease. ACC: American College of Cardiology. AHA: American Heart Association. CCS: Canadian Cardiovascular Society. NICE: National Institute for Health and Care Excellence. USPSTF: US Preventive Services Task Force. ESC: European Society of Cardiology. EAS: European Atherosclerosis Society.

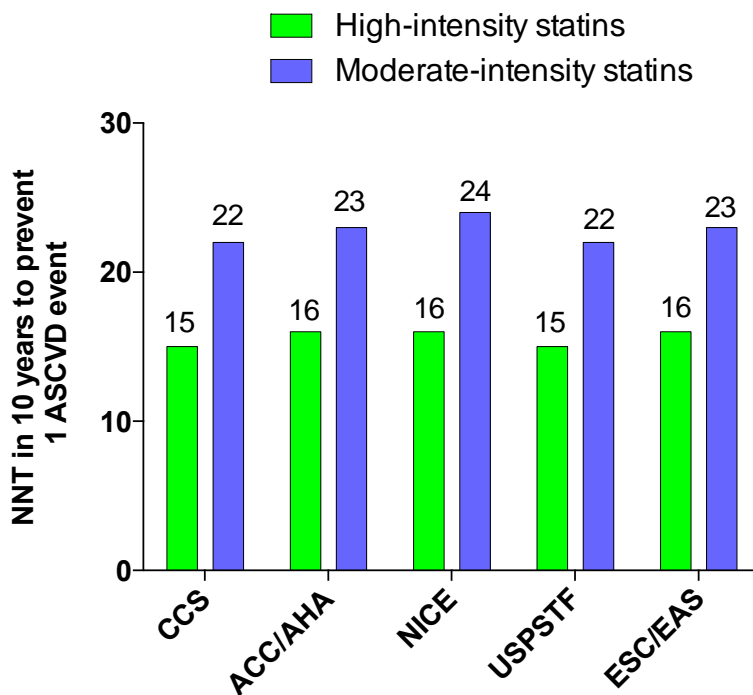

**Figure 11. The number needed to treat (NNT) to prevent one ASCVD event in primary prevention in individuals aged 66-75.**

ASCVD: Atherosclerotic cardiovascular disease. ACC: American College of Cardiology. AHA: American Heart Association. CCS: Canadian Cardiovascular Society. NICE: National Institute for Health and Care Excellence. USPSTF: US Preventive Services Task Force. ESC: European Society of Cardiology. EAS: European Atherosclerosis Society.
